# Supplementary material for: The unusual effect of paraffin wax on the thermal decomposition of cyclotetramethylenetetranitramine
Source: Royal Society of Chemistry journal article supplement (doi:10.1039/d3ra01360j), 2023-01-01
Supplement: d3ra01360j1.pdf [file d3ra01360j1.pdf]

# Supplementary material

## The unusual effect of paraffin wax on thermal decomposition of cyclotetramethylenetetranitramine

Zunjian Hu <sup>1,2</sup>, Wei Peng <sup>1,2</sup>, Gang Li <sup>1</sup>, Fang Yang <sup>1</sup>, Qian Yu <sup>1</sup>, Zhirong Suo <sup>2\*</sup>, Ruijuan Xu <sup>1\*</sup>,  
Chuande Zhao<sup>1\*</sup>

<sup>1</sup>Institute of Chemical Materials, China Academy of Engineering Physics (CAEP),  
Mianyang, Sichuan 621900, China

<sup>2</sup>School of Materials Science and Engineering, Southwest University of Science and Technology,  
Mianyang 621010, China

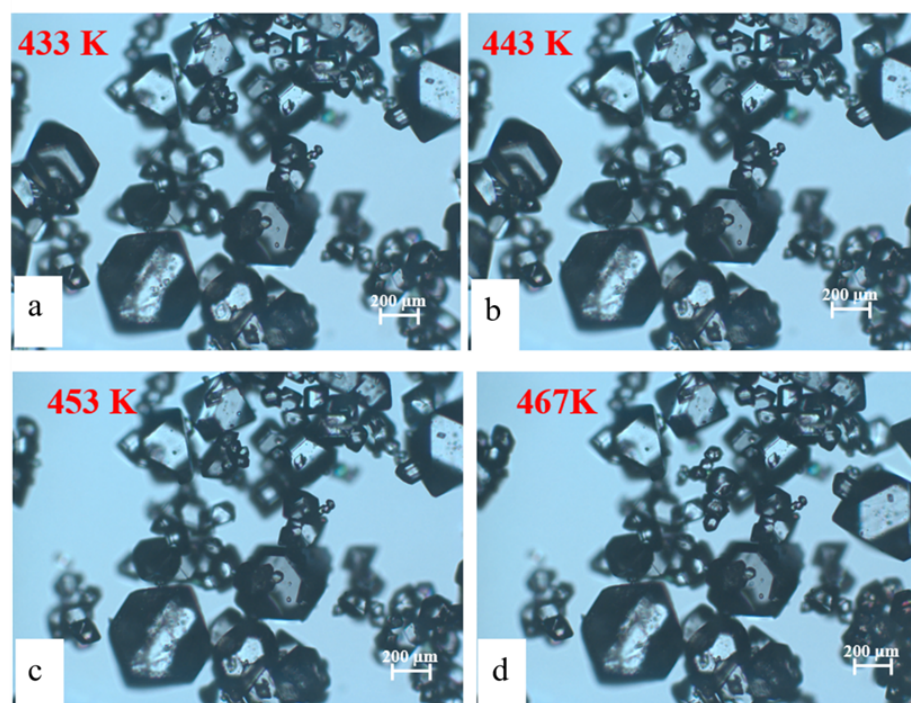

**Fig. S1** Micrographs of HMX taken with an *in situ* optical microscope

### The surface energy of PW and HMX

A ZL-2 automatic tensiometer was used to measure the surface tension of PW. The standard test solution contained water and glycerol. The surface energy, including the polarity and dispersion components, was calculated using geometric equations and the Owen-Kaelble-Chan equation.

---

\* Corresponding author.

E-mail address: suozhirong@163.com (Z. Suo), xuruij@caep.cn (R.J. Xu), c.d.zhao@caep.cn (C.D. Zhao)

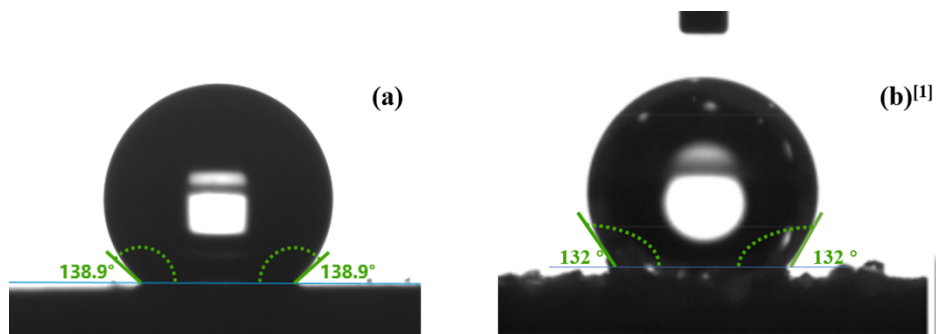

**Fig. S2** Contact angles of (a) PW and (b) <sup>[1]</sup>HMX measured with water (HMX contact angle was cited from the literature)

**Table S1** The surface energy of PW and HMX

| Sample | Surface energy (mN/m) |            |          |
|--------|-----------------------|------------|----------|
|        | $\gamma^p$            | $\gamma^d$ | $\gamma$ |
| HMX    | 6.67                  | 44.63      | 51.30    |
| PW     | 0.16                  | 0.39       | 6.55     |

Note:  $\gamma^p$  and  $\gamma^d$  represent the polarity and dispersion components, respectively, while  $\gamma$  represents surface energy.

**Table S2** Decomposition parameters of HMX and PW/HMX

| Sample | $T_0$ (K) | $T_i$ (K) | $P_i$ (MPa) | $dP/dt_{max}$ (MPa min <sup>-1</sup> ) | $P_{max}$ (MPa) |
|--------|-----------|-----------|-------------|----------------------------------------|-----------------|
| HMX    | 449.7     | 511.5     | 0.15        | 2.54                                   | 2.17            |
| PW/HMX | 484.8     | 510.5     | 0.19        | 0.95                                   | 1.21            |

Note:  $T_0$  is the initial decomposition temperature,  $T_i$  is the temperature at ignition,  $P_i$  is the pressure at ignition,  $P_{max}$  is the maximum pressure, and  $dP/dt_{max}$  is the maximum pressure growth rate.

### Dynamic simulations

The ARC data model dynamics analysis was based on three assumptions.

The first assumption was made for the model-based method: (i) the reaction consists of several

elementary reaction steps; (ii) the reaction rate of each step can be described by a kinetic equation depending on the concentration of the initial reactant ( $e_j$ ), the concentration of the product ( $p_j$ ), the pre-exponential factor ( $A_j$ ) and the activation energy ( $E_j$ ) which is specific only for this step. The equation is the following:

$$ReactionRate_j = -A_j f_j(e_j, p_j) \exp\left(-\frac{E_j}{RT}\right) \quad (1)$$

Each step has its own reaction type described by the function  $f_j(e_j, p_j)$ .

The second assumption was made for the model-based analysis: (i) the kinetic parameters are constant during the reaction for every step, including the activation energy, the pre-exponential factor, and the order of reaction; (ii) the reaction type is constant during the reaction.

The third assumption was also made for the model-based analysis: (i) the total thermoanalytical signal is the sum of the signals of each reaction step; (ii) the signal of each step is calculated as the reaction rate multiplied by the total effect of a given step (e.g., the total enthalpy change or total mass loss).

Data fitting can be carried out by the Kinetics NEO software.

The kinetic parameters of HMX and PW/HMX were fitted according to Eq. 1, as shown in the following figure:

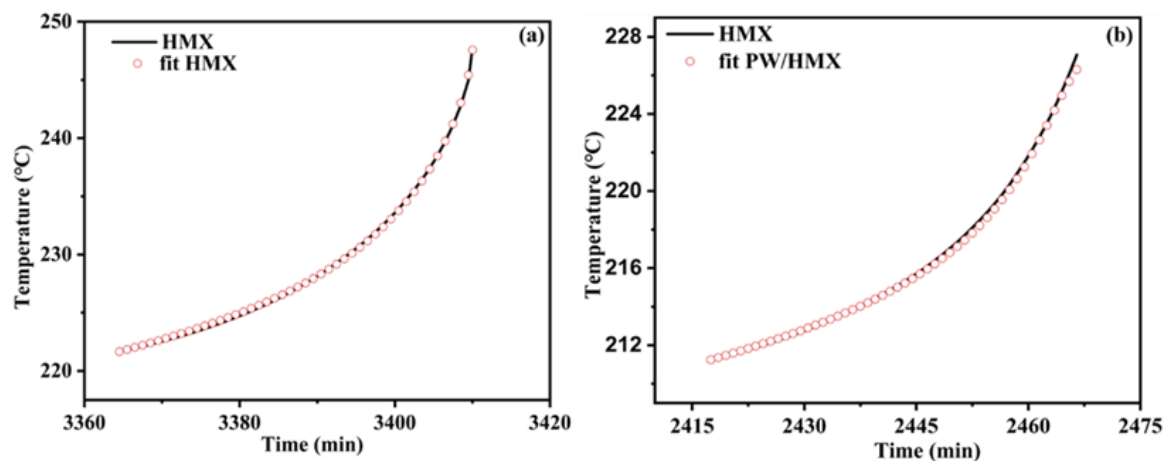

**Fig. S3** The reconstructed adiabatic decomposition curves based on kinetic parameters for (a) HMX

and (b) PW/HMX.

**Reference**

[1] T. Liu, C. Geng, B. Zheng, S. Li, Encapsulation of cyclotetramethylenetetranitramine (hmx) by electrostatically self-assembled graphene oxide for desensitization, *Propell. Explos. Pyrot.* 42 (9) (2017) 1057-1065.
